# Supplementary material for: Insurance-Based Differences in Time to Diagnostic Follow-up after Positive Screening Mammography
Source: Oxford University Press journal article supplement (doi:10.1158/1055-9965.epi-16-0148), 2016-10-31
Supplement: 10559965epi160148-sup-161083_2_supp_3604021_yb1hzz.doc [file 10559965epi160148-sup-161083_2_supp_3604021_yb1hzz.doc]

**Supplemental Table S1. Comparison of characteristics among women ages 40 and older with and without follow-up** **after a positive screening mammogram, 1995-2010**

|  | **No Follow-up**  **n (%)** | **Follow-up**  **n (%)** | **p-value a** |
| --- | --- | --- | --- |
| **Total** | 4,346 | 38,680 |  |
| **Race/Ethnicity** |  |  | <0.0001 |
| White, Non-Hispanic | 3,547 (81.6) | 31,305 (80.9) |
| Black, Non-Hispanic | 575 (13.2) | 4,567 (11.8) |
| Other | 89 (2.1) | 904 (2.3) |
| Unknown | 135 (3.1) | 1,904 (4.9) |
| **Age (years)** |  |  | <0.0001 |
| 40-49 | 1,658 (38.2) | 12,689 (32.8) |
| 50-59 | 1,243 (28.6) | 10,995 (28.4) |
| 60-64 | 451 (10.4) | 4,158 (10.8) |
| 65+ | 994 (22.9) | 10,838 (28.0) |
| **Education** |  |  | <0.0001 |
| < High school graduate | 363 (8.4) | 2,849 (7.4) |
| High school graduate | 939 (21.6) | 9,520 (24.6) |
| Some college | 815 (18.8) | 8,762 (22.7) |
| College graduate | 748 (17.2) | 9,203 (23.8) |
| Unknown | 1,481 (34.1) | 8,346 (21.6) |
| **Breast Density** |  |  | <0.0001 |
| Almost entirely fatty | 89 (2.1) | 1,063 (2.8) |
| Scattered fibroglandular densities | 2,070 (47.6) | 17,031 (44.0) |
| Heterogeneously dense | 1,905 (43.8) | 17,147 (44.3) |
| Extremely dense | 282 (6.5) | 3,439 (8.9) |

a All p-values are two-sided and α<0.05 was considered statistically significant.
